# Supplementary material for: LHP1 Regulates H3K27me3 Spreading and Shapes the Three-Dimensional Conformation of the Arabidopsis Genome
Source: PLoS One. 2016 Jul 13;11(7):e0158936. doi: 10.1371/journal.pone.0158936 (PMC4943711; doi:10.1371/journal.pone.0158936)
Supplement: S2 Appendix — Up and down regulated TAIR10 Gene accession list. (XLSX) [file pone.0158936.s002.xlsx]

## Sheet: Sheet1
UR_lhp1	DR_lhp1
AT1G01070	AT1G01340
AT1G01590	AT1G02360
AT1G01600	AT1G02390
AT1G02065	AT1G02400
AT1G02190	AT1G03230
AT1G02205	AT1G03730
AT1G02340	AT1G04040
AT1G02630	AT1G04240
AT1G02800	AT1G04250
AT1G02850	AT1G04360
AT1G03170	AT1G04610
AT1G03820	AT1G04710
AT1G04500	AT1G05010
AT1G04580	AT1G05020
AT1G05420	AT1G05135
AT1G05440	AT1G05575
AT1G05490	AT1G05670
AT1G05680	AT1G05675
AT1G05710	AT1G06080
AT1G06100	AT1G06360
AT1G06350	AT1G06620
AT1G06520	AT1G06980
AT1G07430	AT1G09250
AT1G07450	AT1G09480
AT1G07985	AT1G09950
AT1G08115	AT1G10560
AT1G08560	AT1G10990
AT1G09390	AT1G11185
AT1G09600	AT1G11300
AT1G10540	AT1G11545
AT1G10980	AT1G11670
AT1G11070	AT1G11735
AT1G11080	AT1G12080
AT1G11720	AT1G12610
AT1G11850	AT1G13100
AT1G12010	AT1G13110
AT1G12013	AT1G14120
AT1G12200	AT1G14700
AT1G12320	AT1G15125
AT1G12380	AT1G15330
AT1G12570	AT1G15580
AT1G12780	AT1G15800
AT1G13130	AT1G15900
AT1G13600	AT1G16130
AT1G14040	AT1G16370
AT1G14040	AT1G16850
AT1G15570	AT1G17147
AT1G16070	AT1G18390
AT1G16410	AT1G18400
AT1G16630	AT1G18570
AT1G16705	AT1G18710
AT1G17020	AT1G18940
AT1G17030	AT1G19020
AT1G17480	AT1G19025
AT1G17710	AT1G19180
AT1G17745	AT1G19510
AT1G18040	AT1G20130
AT1G18250	AT1G20190
AT1G19790	AT1G20390
AT1G19830	AT1G20510
AT1G19940	AT1G21050
AT1G20015	AT1G21130
AT1G20120	AT1G21326
AT1G20160	AT1G21540
AT1G20990	AT1G21670
AT1G21120	AT1G21830
AT1G21310	AT1G22400
AT1G21440	AT1G22540
AT1G21460	AT1G24140
AT1G21980	AT1G24147
AT1G22065	AT1G25400
AT1G22130	AT1G25425
AT1G22340	AT1G26945
AT1G22440	AT1G27730
AT1G23052	AT1G28010
AT1G23120	AT1G28370
AT1G23205	AT1G29270
AT1G23410	AT1G29430
AT1G23760	AT1G29440
AT1G24020	AT1G29450
AT1G24070	AT1G29460
AT1G24095	AT1G29465
AT1G24260	AT1G29500
AT1G24265	AT1G29510
AT1G25510	AT1G29660
AT1G25530	AT1G30135
AT1G26380	AT1G30190
AT1G26390	AT1G30370
AT1G26420	AT1G30840
AT1G26560	AT1G31290
AT1G26780	AT1G31350
AT1G26930	AT1G31580
AT1G27020	AT1G31690
AT1G27045	AT1G33610
AT1G27620	AT1G33612
AT1G27940	AT1G33930
AT1G28230	AT1G35210
AT1G28290	AT1G36940
AT1G28360	AT1G42980
AT1G28570	AT1G44350
AT1G29050	AT1G48260
AT1G30160	AT1G49780
AT1G30700	AT1G50290
AT1G31770	AT1G50750
AT1G32450	AT1G52190
AT1G32910	AT1G52270
AT1G33790	AT1G52830
AT1G34060	AT1G53163
AT1G34580	AT1G53170
AT1G35290	AT1G53700
AT1G35310	AT1G54010
AT1G35780	AT1G54870
AT1G43640	AT1G55450
AT1G43800	AT1G56240
AT1G44760	AT1G56242
AT1G44970	AT1G56250
AT1G47960	AT1G56550
AT1G48580	AT1G56600
AT1G49830	AT1G56660
AT1G49870	AT1G58340
AT1G51270	AT1G59590
AT1G51440	AT1G59740
AT1G51460	AT1G60190
AT1G51800	AT1G61340
AT1G51820	AT1G61890
AT1G51850	AT1G62440
AT1G51860	AT1G62510
AT1G51890	AT1G62770
AT1G52030	AT1G63350
AT1G52040	AT1G63750
AT1G52400	AT1G63820
AT1G52410	AT1G64065
AT1G52700	AT1G64110
AT1G52855	AT1G64380
AT1G52890	AT1G64660
AT1G53070	AT1G64670
AT1G53160	AT1G65310
AT1G53860	AT1G65390
AT1G54020	AT1G66060
AT1G54575	AT1G66090
AT1G55020	AT1G66100
AT1G55210	AT1G66270
AT1G57590	AT1G66280
AT1G58460	AT1G67470
AT1G59640	AT1G67900
AT1G60060	AT1G68840
AT1G60380	AT1G69530
AT1G60390	AT1G69890
AT1G61810	AT1G70940
AT1G61820	AT1G70985
AT1G62360	AT1G72520
AT1G62500	AT1G73480
AT1G62540	AT1G73550
AT1G62560	AT1G73700
AT1G62710	AT1G73805
AT1G62810	AT1G73830
AT1G62870	AT1G74440
AT1G63100	AT1G74490
AT1G63650	AT1G74670
AT1G63710	AT1G74930
AT1G64780	AT1G75490
AT1G65150	AT1G76240
AT1G65450	AT1G76360
AT1G65480	AT1G76600
AT1G65690	AT1G76610
AT1G65730	AT1G76640
AT1G65890	AT1G77210
AT1G65900	AT1G77330
AT1G66783	AT1G78070
AT1G67035	AT1G78410
AT1G67110	AT1G78850
AT1G67760	AT1G80240
AT1G67860	AT1G80840
AT1G68170	AT2G01021
AT1G68320	AT2G01670
AT1G68360	AT2G02950
AT1G68570	AT2G05280
AT1G68795	AT2G05290
AT1G69120	AT2G06002
AT1G69180	AT2G06050
AT1G69310	AT2G10940
AT1G69790	AT2G13790
AT1G69810	AT2G14580
AT1G69870	AT2G15020
AT1G69880	AT2G15040
AT1G69920	AT2G15042
AT1G70500	AT2G15060
AT1G70510	AT2G15080
AT1G70680	AT2G16005
AT1G71380	AT2G16380
AT1G71880	AT2G17660
AT1G72070	AT2G17705
AT1G72200	AT2G19660
AT1G72240	AT2G19800
AT1G72250	AT2G19810
AT1G72810	AT2G20750
AT1G73600	AT2G20835
AT1G73630	AT2G21650
AT1G74010	AT2G22190
AT1G74020	AT2G22200
AT1G75390	AT2G22330
AT1G75520	AT2G22540
AT1G75640	AT2G22770
AT1G75730	AT2G22860
AT1G75900	AT2G22880
AT1G75910	AT2G22890
AT1G76420	AT2G23170
AT1G76930	AT2G23320
AT1G77270	AT2G23680
AT1G77380	AT2G23770
AT1G77520	AT2G24600
AT1G77855	AT2G25460
AT1G77870	AT2G25510
AT1G77990	AT2G25735
AT1G78320	AT2G26190
AT1G78370	AT2G26530
AT1G78960	AT2G26580
AT1G79900	AT2G26710
AT1G80050	AT2G27402
AT1G80130	AT2G27690
AT1G80160	AT2G28550
AT1G80830	AT2G28560
AT2G01422	AT2G30020
AT2G01610	AT2G30040
AT2G01830	AT2G30250
AT2G01900	AT2G30420
AT2G03090	AT2G30424
AT2G03710	AT2G30766
AT2G04170	AT2G31230
AT2G04570	AT2G31880
AT2G04795	AT2G32200
AT2G05440	AT2G32800
AT2G06255	AT2G34600
AT2G06950	AT2G34770
AT2G12480	AT2G34930
AT2G14610	AT2G35710
AT2G16570	AT2G35930
AT2G16700	AT2G37030
AT2G16760	AT2G37430
AT2G17280	AT2G38470
AT2G18230	AT2G38530
AT2G18500	AT2G38790
AT2G18550	AT2G38940
AT2G19190	AT2G39250
AT2G19910	AT2G39705
AT2G19920	AT2G39855
AT2G19970	AT2G39980
AT2G20515	AT2G40530
AT2G20870	AT2G40610
AT2G21188	AT2G40750
AT2G21260	AT2G41090
AT2G21450	AT2G41100
AT2G22420	AT2G41240
AT2G22905	AT2G41730
AT2G22970	AT2G41940
AT2G23060	AT2G41990
AT2G23340	AT2G42380
AT2G23530	AT2G43010
AT2G24440	AT2G43590
AT2G24762	AT2G44840
AT2G25000	AT2G44910
AT2G25090	AT2G46330
AT2G25260	AT2G46400
AT2G25270	AT2G46440
AT2G25625	AT3G01290
AT2G26400	AT3G01490
AT2G27220	AT3G01830
AT2G27990	AT3G02840
AT2G28140	AT3G03000
AT2G28420	AT3G03820
AT2G28780	AT3G03830
AT2G28790	AT3G03840
AT2G29130	AT3G03850
AT2G29350	AT3G04090
AT2G29370	AT3G04140
AT2G29420	AT3G05140
AT2G30370	AT3G05150
AT2G30750	AT3G05320
AT2G30933	AT3G05370
AT2G31560	AT3G05727
AT2G31945	AT3G05730
AT2G32280	AT3G05800
AT2G32487	AT3G05890
AT2G32530	AT3G06070
AT2G32590	AT3G06370
AT2G32960	AT3G06490
AT2G33385	AT3G06890
AT2G33480	AT3G06990
AT2G34340	AT3G07195
AT2G34500	AT3G07350
AT2G34830	AT3G09020
AT2G34960	AT3G09160
AT2G35150	AT3G09540
AT2G35310	AT3G09550
AT2G35340	AT3G10720
AT2G35950	AT3G10930
AT2G36270	AT3G11840
AT2G36570	AT3G13270
AT2G36660	AT3G14210
AT2G36780	AT3G15210
AT2G36885	AT3G15356
AT2G36890	AT3G15540
AT2G37090	AT3G15760
AT2G37460	AT3G15950
AT2G37760	AT3G16030
AT2G37770	AT3G16530
AT2G37900	AT3G16660
AT2G38110	AT3G16670
AT2G38160	AT3G16690
AT2G38180	AT3G16720
AT2G38995	AT3G17330
AT2G39200	AT3G18690
AT2G39230	AT3G19200
AT2G39330	AT3G19390
AT2G39510	AT3G20087
AT2G39518	AT3G20370
AT2G40330	AT3G20420
AT2G40370	AT3G20830
AT2G40435	AT3G21320
AT2G40460	AT3G21330
AT2G41480	AT3G21720
AT2G42200	AT3G22142
AT2G42570	AT3G22231
AT2G42800	AT3G22235
AT2G42835	AT3G22820
AT2G42990	AT3G22886
AT2G43510	AT3G23030
AT2G43520	AT3G23050
AT2G43570	AT3G23230
AT2G43620	AT3G23480
AT2G44130	AT3G23550
AT2G44370	AT3G24503
AT2G44460	AT3G25250
AT2G44480	AT3G25610
AT2G44690	AT3G25670
AT2G44745	AT3G25710
AT2G45080	AT3G25760
AT2G45210	AT3G25770
AT2G45220	AT3G27170
AT2G45650	AT3G27250
AT2G46140	AT3G27500
AT2G46680	AT3G28007
AT2G47190	AT3G28120
AT2G47270	AT3G28340
AT2G47750	AT3G28420
AT2G47800	AT3G41768
AT3G01220	AT3G42800
AT3G01970	AT3G43430
AT3G02620	AT3G43850
AT3G02875	AT3G44860
AT3G03060	AT3G45430
AT3G03270	AT3G45640
AT3G03450	AT3G45650
AT3G03460	AT3G45730
AT3G03470	AT3G45860
AT3G03480	AT3G46490
AT3G04070	AT3G47340
AT3G04520	AT3G48520
AT3G04960	AT3G48650
AT3G05030	AT3G48720
AT3G05400	AT3G49130
AT3G05620	AT3G49950
AT3G05650	AT3G50140
AT3G05690	AT3G50260
AT3G05980	AT3G50270
AT3G06160	AT3G50340
AT3G06220	AT3G50740
AT3G06435	AT3G50750
AT3G06630	AT3G51450
AT3G06640	AT3G52310
AT3G07340	AT3G52450
AT3G08040	AT3G52520
AT3G08770	AT3G53180
AT3G08860	AT3G55646
AT3G10000	AT3G55740
AT3G10040	AT3G55840
AT3G10320	AT3G55880
AT3G10450	AT3G55940
AT3G10570	AT3G55970
AT3G11000	AT3G55980
AT3G11150	AT3G56060
AT3G11340	AT3G56400
AT3G11410	AT3G56710
AT3G12145	AT3G57740
AT3G12460	AT3G58120
AT3G12500	AT3G58850
AT3G12502	AT3G59900
AT3G12520	AT3G60220
AT3G12870	AT3G60390
AT3G12890	AT3G60670
AT3G13445	AT3G61680
AT3G13640	AT3G62100
AT3G13650	AT3G63440
AT3G14620	AT4G00360
AT3G15270	AT4G00970
AT3G15340	AT4G01250
AT3G15510	AT4G01335
AT3G15720	AT4G01360
AT3G15990	AT4G01380
AT3G15990	AT4G01390
AT3G16330	AT4G01950
AT3G16410	AT4G02380
AT3G17050	AT4G02410
AT3G17609	AT4G02420
AT3G18280	AT4G04223
AT3G18330	AT4G04840
AT3G18550	AT4G08040
AT3G19150	AT4G08991
AT3G19550	AT4G09460
AT3G19660	AT4G10150
AT3G20100	AT4G10310
AT3G20220	AT4G11280
AT3G20210	AT4G11290
AT3G20470	AT4G11521
AT3G20520	AT4G11521
AT3G21020	AT4G12310
AT3G21040	AT4G12320
AT3G21080	AT4G12830
AT3G21240	AT4G13260
AT3G21250	AT4G13395
AT3G21420	AT4G13840
AT3G21460	AT4G14365
AT3G21600	AT4G14400
AT3G22240	AT4G14465
AT3G22410	AT4G14550
AT3G22460	AT4G14570
AT3G22550	AT4G14560
AT3G22640	AT4G15500
AT3G23450	AT4G16515
AT3G23790	AT4G16750
AT3G24340	AT4G16780
AT3G24450	AT4G16980
AT3G25130	AT4G17030
AT3G25190	AT4G17490
AT3G25290	AT4G17810
AT3G26125	AT4G18195
AT3G26210	AT4G18197
AT3G26830	AT4G18280
AT3G26960	AT4G19030
AT3G27025	AT4G20780
AT3G27027	AT4G21390
AT3G27220	AT4G22485
AT3G27650	AT4G22505
AT3G28100	AT4G22513
AT3G28270	AT4G22517
AT3G28345	AT4G22520
AT3G28500	AT4G22590
AT3G28580	AT4G23200
AT3G29810	AT4G23220
AT3G30214	AT4G24275
AT3G44300	AT4G25260
AT3G44735	AT4G25470
AT3G45010	AT4G25480
AT3G45210	AT4G25490
AT3G45680	AT4G25940
AT3G45980	AT4G25990
AT3G46080	AT4G26120
AT3G46090	AT4G26830
AT3G46280	AT4G27657
AT3G46770	AT4G28350
AT3G47030	AT4G28703
AT3G47210	AT4G28720
AT3G47220	AT4G29020
AT3G48020	AT4G29050
AT3G48300	AT4G29190
AT3G50070	AT4G29740
AT3G50770	AT4G30170
AT3G51240	AT4G30280
AT3G51280	AT4G30290
AT3G51720	AT4G30490
AT3G51860	AT4G31290
AT3G52770	AT4G31380
AT3G53980	AT4G32280
AT3G54340	AT4G34135
AT3G55110	AT4G34250
AT3G55290	AT4G34410
AT3G55700	AT4G34530
AT3G55710	AT4G34540
AT3G55890	AT4G35480
AT3G56620	AT4G35985
AT3G57130	AT4G36110
AT3G57260	AT4G36500
AT3G58060	AT4G36550
AT3G58270	AT4G37290
AT3G58770	AT4G37390
AT3G58780	AT4G38830
AT3G58990	AT4G38850
AT3G59140	AT4G39770
AT3G60140	AT4G39800
AT3G60160	AT5G01040
AT3G60710	AT5G01100
AT3G60890	AT5G02200
AT3G60900	AT5G02540
AT3G61250	AT5G02580
AT3G61840	AT5G02760
AT3G61880	AT5G03350
AT3G62590	AT5G03860
AT3G62820	AT5G03960
AT3G63110	AT5G04340
AT4G00310	AT5G05320
AT4G00390	AT5G05600
AT4G00700	AT5G05870
AT4G00870	AT5G05880
AT4G01060	AT5G05890
AT4G01430	AT5G06300
AT4G01500	AT5G06930
AT4G01525	AT5G07000
AT4G01600	AT5G07010
AT4G02630	AT5G07572
AT4G02800	AT5G08240
AT4G02810	AT5G08790
AT4G03060	AT5G10250
AT4G03220	AT5G10570
AT4G03210	AT5G11420
AT4G03320	AT5G12050
AT4G03400	AT5G12940
AT4G04410	AT5G14360
AT4G04610	AT5G14470
AT4G04810	AT5G14730
AT4G04830	AT5G15160
AT4G05020	AT5G15190
AT4G05470	AT5G15265
AT4G08150	AT5G16010
AT4G08160	AT5G16170
AT4G08290	AT5G16350
AT4G08300	AT5G16480
AT4G08770	AT5G17490
AT4G10040	AT5G17690
AT4G10380	AT5G18010
AT4G11320	AT5G18020
AT4G11910	AT5G18030
AT4G11990	AT5G18050
AT4G12130	AT5G18060
AT4G12290	AT5G18080
AT4G12480	AT5G18470
AT4G12490	AT5G19100
AT4G12540	AT5G19110
AT4G12870	AT5G19230
AT4G13210	AT5G19240
AT4G13770	AT5G19250
AT4G14020	AT5G19260
AT4G15210	AT5G23510
AT4G15390	AT5G23600
AT4G15430	AT5G23700
AT4G15440	AT5G23820
AT4G15610	AT5G24580
AT4G15670	AT5G25460
AT4G15680	AT5G25840
AT4G16260	AT5G26010
AT4G16270	AT5G26280
AT4G16563	AT5G26920
AT4G16670	AT5G27420
AT4G16690	AT5G28237
AT4G16745	AT5G28630
AT4G17220	AT5G35480
AT4G17800	AT5G35490
AT4G17920	AT5G35735
AT4G18830	AT5G36925
AT4G18960	AT5G38200
AT4G18980	AT5G38940
AT4G18990	AT5G39670
AT4G19420	AT5G39860
AT4G19430	AT5G40540
AT4G19700	AT5G41400
AT4G20000	AT5G41590
AT4G20110	AT5G41750
AT4G21120	AT5G41761
AT4G21590	AT5G42530
AT4G21620	AT5G42650
AT4G21650	AT5G43890
AT4G21680	AT5G44050
AT4G21930	AT5G44568
AT4G21970	AT5G44582
AT4G22470	AT5G45280
AT4G22570	AT5G45340
AT4G23680	AT5G45630
AT4G23720	AT5G45840
AT4G24000	AT5G46710
AT4G24015	AT5G47220
AT4G24040	AT5G47230
AT4G24120	AT5G47240
AT4G24130	AT5G47370
AT4G24140	AT5G47380
AT4G24150	AT5G47610
AT4G24450	AT5G48900
AT4G25000	AT5G49700
AT4G25800	AT5G50335
AT4G25845	AT5G52020
AT4G25850	AT5G52050
AT4G26255	AT5G52900
AT4G26260	AT5G52940
AT4G26660	AT5G54585
AT4G26790	AT5G55450
AT4G27480	AT5G55460
AT4G27980	AT5G56230
AT4G28390	AT5G56980
AT4G28680	AT5G57220
AT4G29030	AT5G57760
AT4G30250	AT5G57770
AT4G30270	AT5G58120
AT4G30430	AT5G59070
AT4G30450	AT5G59260
AT4G30460	AT5G59540
AT4G31330	AT5G59550
AT4G31610	AT5G59580
AT4G31615	AT5G59730
AT4G31730	AT5G59732
AT4G31910	AT5G61160
AT4G31970	AT5G61350
AT4G32480	AT5G61660
AT4G32650	AT5G62280
AT4G32780	AT5G62360
AT4G33150	AT5G62470
AT4G33550	AT5G62630
AT4G33810	AT5G63130
AT4G34230	AT5G63450
AT4G34588	AT5G63790
AT4G35110	AT5G64770
AT4G35180	AT5G64780
AT4G35190	AT5G65300
AT4G35690	AT5G65800
AT4G36060	AT5G65925
AT4G37520	AT5G66580
AT4G37810	AT5G66610
AT4G37970	AT5G66640
AT4G39210	AT5G66650
AT4G39330	AT5G66675
AT4G39480	AT5G67080
AT4G39810
AT4G39955
AT5G01360
AT5G01380
AT5G01747
AT5G01840
AT5G01880
AT5G01881
AT5G02030
AT5G02230
AT5G02260
AT5G02490
AT5G03680
AT5G03840
AT5G04840
AT5G04950
AT5G05060
AT5G05340
AT5G05960
AT5G06530
AT5G07680
AT5G08640
AT5G09300
AT5G09730
AT5G09876
AT5G10210
AT5G10380
AT5G10580
AT5G10770
AT5G11360
AT5G11920
AT5G12080
AT5G12270
AT5G12280
AT5G13320
AT5G13330
AT5G13930
AT5G14180
AT5G14200
AT5G14940
AT5G15120
AT5G15310
AT5G15500
AT5G15510
AT5G15850
AT5G17090
AT5G17160
AT5G17210
AT5G17450
AT5G17760
AT5G17860
AT5G18040
AT5G18670
AT5G19740
AT5G20240
AT5G20420
AT5G20670
AT5G20740
AT5G20830
AT5G21150
AT5G21950
AT5G22430
AT5G22460
AT5G23000
AT5G23170
AT5G23530
AT5G23810
AT5G23940
AT5G24280
AT5G24660
AT5G24770
AT5G24780
AT5G24910
AT5G25090
AT5G25220
AT5G25240
AT5G25390
AT5G25820
AT5G26660
AT5G27360
AT5G28030
AT5G28145
AT5G33370
AT5G35732
AT5G35935
AT5G37020
AT5G37300
AT5G37540
AT5G37940
AT5G37950
AT5G38000
AT5G38710
AT5G39220
AT5G39420
AT5G39520
AT5G39890
AT5G40690
AT5G40760
AT5G40960
AT5G41070
AT5G41471
AT5G42230
AT5G42830
AT5G43180
AT5G43380
AT5G44350
AT5G44390
AT5G44420
AT5G44430
AT5G44440
AT5G44572
AT5G44620
AT5G44630
AT5G45380
AT5G45730
AT5G45850
AT5G45920
AT5G45960
AT5G45970
AT5G45990
AT5G46050
AT5G46330
AT5G46590
AT5G47060
AT5G47330
AT5G47600
AT5G48310
AT5G48480
AT5G48485
AT5G48560
AT5G48650
AT5G48820
AT5G48920
AT5G49320
AT5G49330
AT5G49520
AT5G50260
AT5G50790
AT5G50800
AT5G50915
AT5G51480
AT5G51750
AT5G52390
AT5G53120
AT5G53486
AT5G53880
AT5G53950
AT5G54130
AT5G54400
AT5G55180
AT5G55700
AT5G55720
AT5G56320
AT5G56795
AT5G56870
AT5G56970
AT5G57123
AT5G57520
AT5G57685
AT5G58700
AT5G59220
AT5G59310
AT5G59320
AT5G59670
AT5G59720
AT5G60150
AT5G60250
AT5G60760
AT5G60910
AT5G61030
AT5G61420
AT5G61820
AT5G61850
AT5G62040
AT5G62130
AT5G62165
AT5G62210
AT5G62230
AT5G62730
AT5G62850
AT5G63090
AT5G63530
AT5G64080
AT5G64100
AT5G64120
AT5G64552
AT5G64700
AT5G65870
AT5G66350
AT5G67110
AT5G67160
AT5G67200
AT5G67460
AT5G67480
AT5G67520
